# Supplementary material for: Exploring Mn2+-location-dependent red emission from (Mn/Zn)–Ga–Sn–S supertetrahedral nanoclusters with relatively precise dopant positions
Source: Royal Society of Chemistry journal article supplement (doi:10.1039/c6tc03844a), 2016-01-01
Supplement: c6tc03844a1.pdf [file c6tc03844a1.pdf]

*Electronic Supplementary Information (ESI)*

**Exploring Mn<sup>2+</sup>-Location-Dependent Red Emission from (Mn/Zn)-  
Ga-Sn-S Supertetrahedral Nanocluster with Relatively Precise  
Dopant Position**

Qian Zhang,<sup>a</sup> Jian Lin,<sup>a</sup> Yun-Tao Yang,<sup>c</sup> Zhen-Zhen Qin,<sup>c</sup> Dongsheng Li,<sup>b</sup> Shuao  
Wang,<sup>c</sup> Yipu Liu,<sup>d</sup> Xiaoxin Zou,<sup>d</sup> Yan-Bo Wu\*<sup>e</sup> and Tao Wu\*<sup>a</sup>

<sup>a</sup> *College of Chemistry, Chemical Engineering and Materials Science, Soochow University, Jiangsu 215123, China.*

<sup>b</sup> *College of Materials and Chemical Engineering, Key Laboratory of Inorganic Non-metallic Crystalline and Energy Conversion Materials, China Three Gorges University, Yichang 443002, China.*

<sup>c</sup> *School for Radiological and Interdisciplinary Sciences (RAD-X), Soochow University, Jiangsu 215123, China.*

<sup>d</sup> *State Key Laboratory of Inorganic Synthesis and Preparative Chemistry, International Joint Research Laboratory of Nano-Micro Architecture Chemistry, College of Chemistry, Jilin University, Changchun 130012, P. R. China.*

<sup>e</sup> *The Key Laboratory of the Materials for Energy Storage and Conversion of Shanxi Province, Institute of Molecular Science, Shanxi University, Taiyuan 030006, Shanxi, China.*

\* Corresponding author: E-mail: [wutao@suda.edu.cn](mailto:wutao@suda.edu.cn); [wyb@sxu.edu.cn](mailto:wyb@sxu.edu.cn)

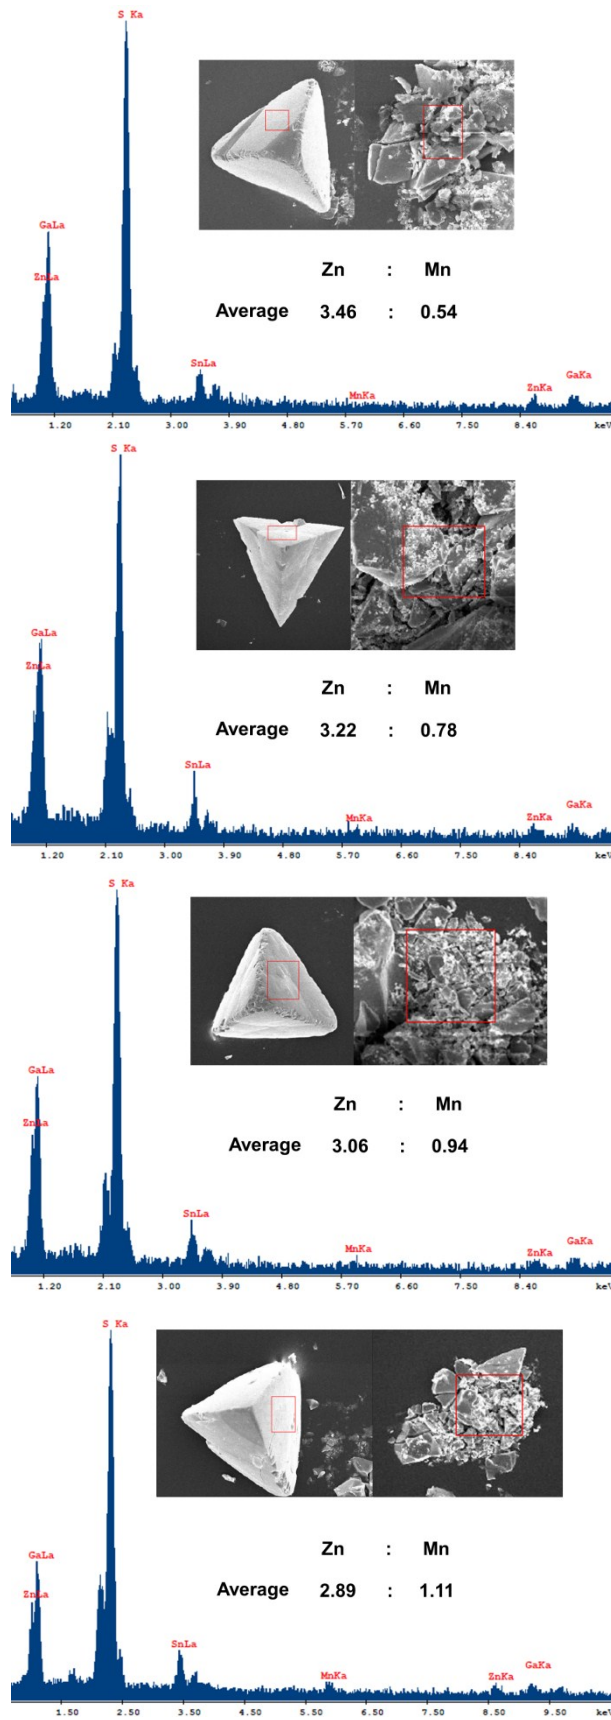

Fig. S1 EDS of four batches of  $Mn^{2+}$ -doped OCF-40-ZnGaSnS samples.

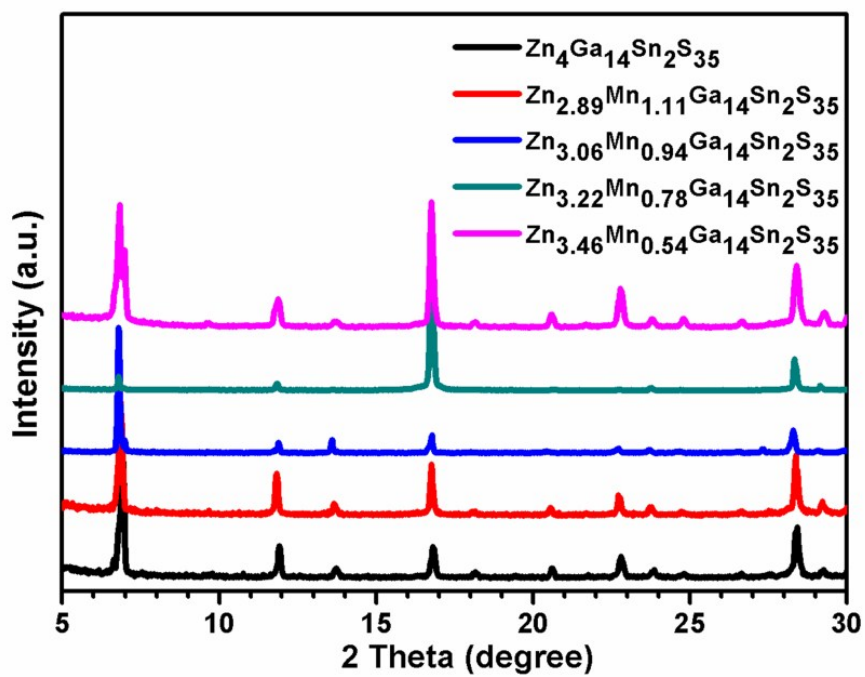

Fig. S2 PXRD patterns of Mn<sup>2+</sup>-doped samples at room temperature.

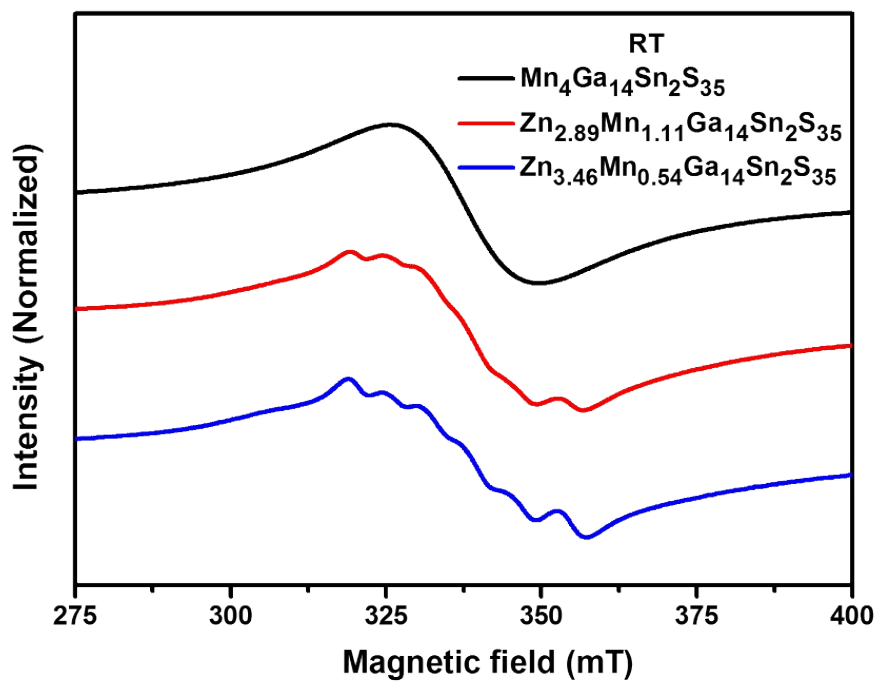

Fig. S3 EPR signals of OCF-40-MnGaSnS and Mn<sup>2+</sup>-doped samples under room temperature.

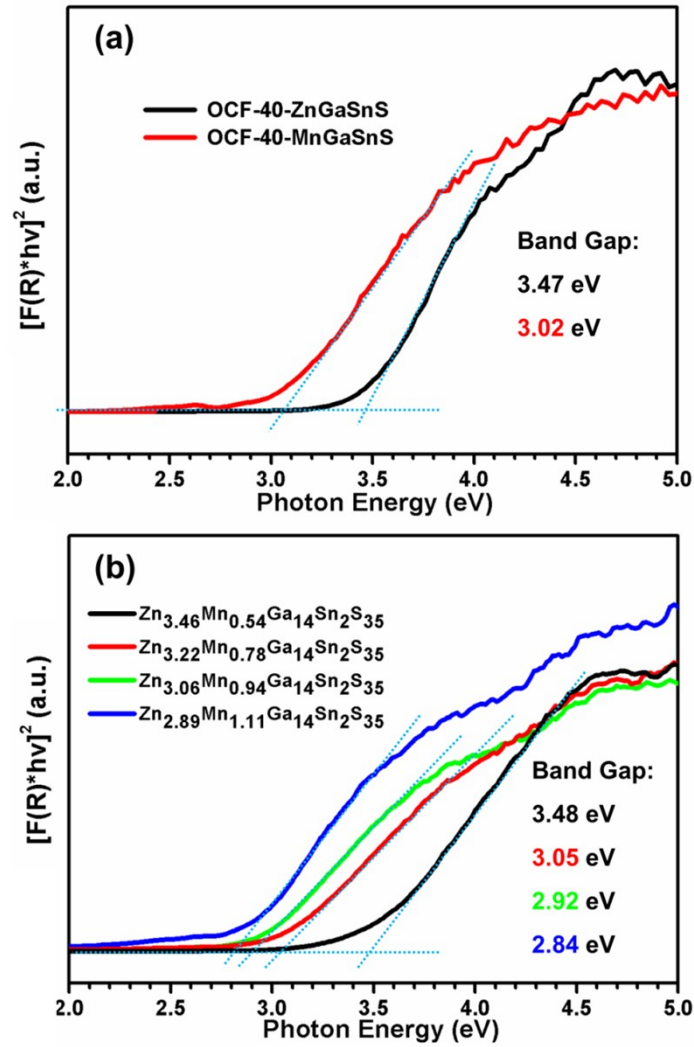

Fig. S4 Tauc plots of OCF-40-ZnGaSnS, OCF-40-MnGaSnS and Mn<sup>2+</sup>-doped samples.

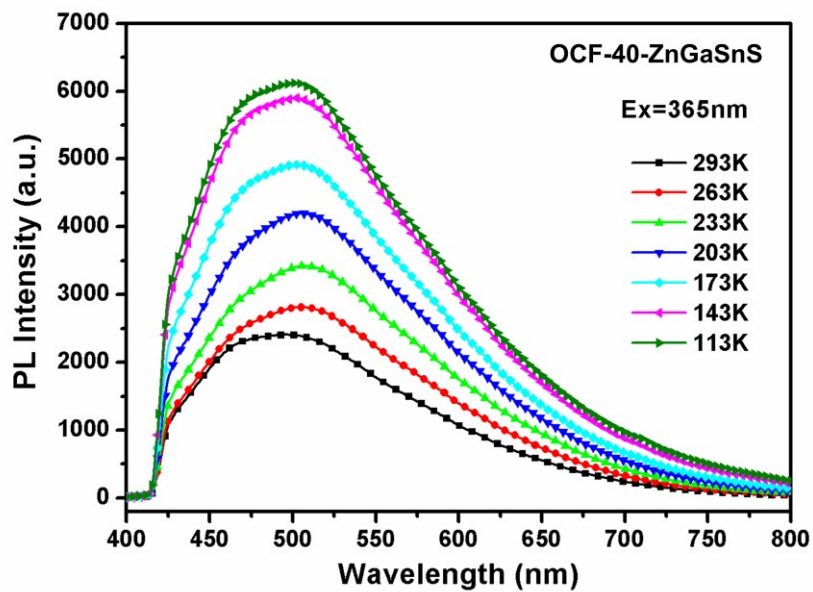

Fig. S5 Single-crystal PL of OCF-40-ZnGaSnS excited at 365 nm.

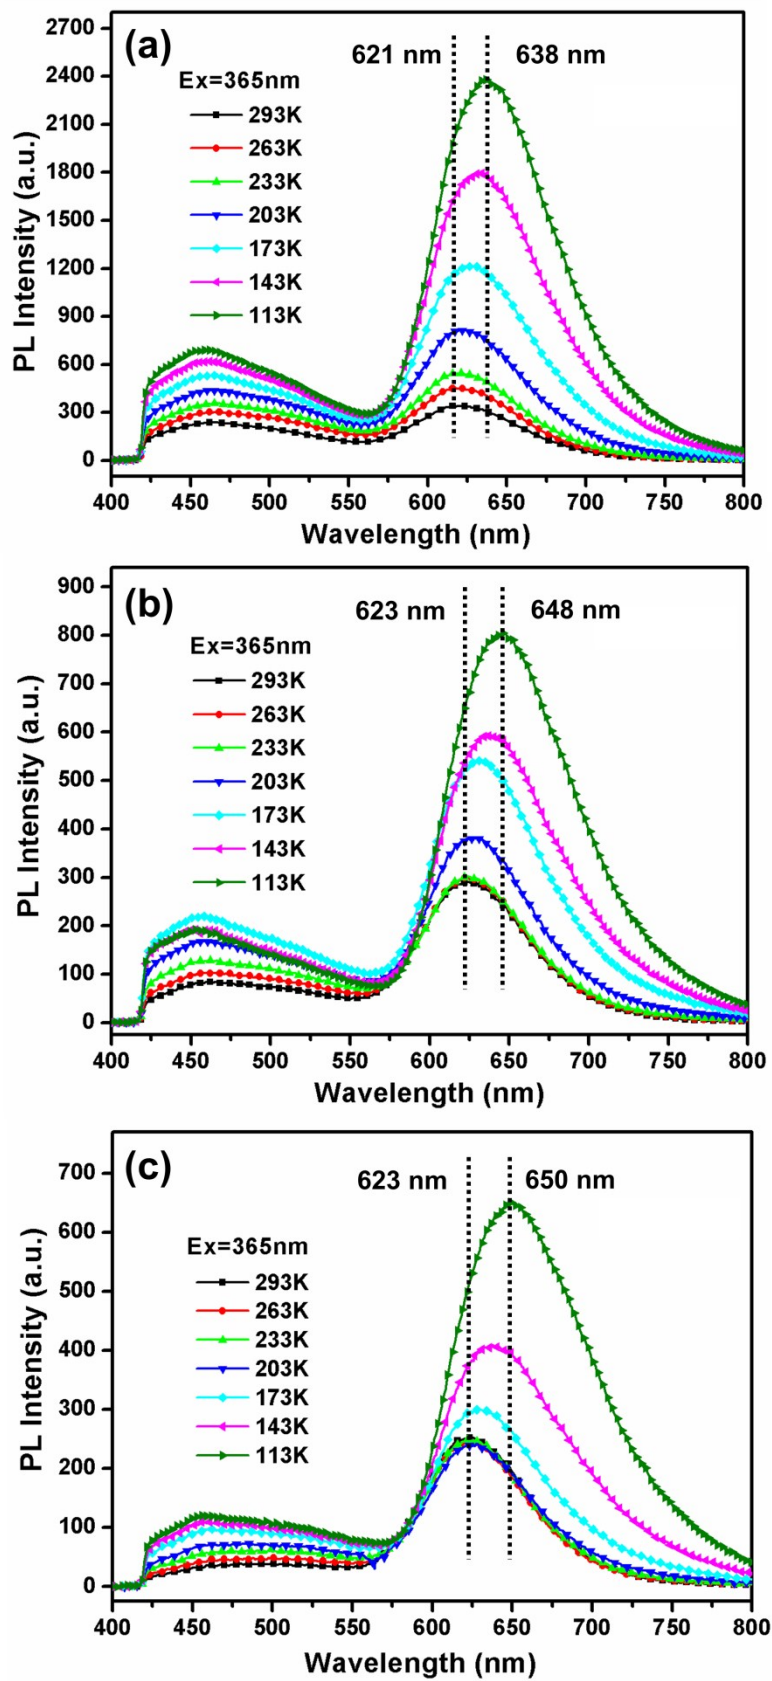

**Fig. S6** Single-crystal PL spectra of  $\text{Mn}^{2+}$ -doped OCF-40-ZnGaSnS: (a)  $\text{Zn}_{3.46}\text{Mn}_{0.54}\text{Ga}_{14}\text{Sn}_2\text{S}_{35}$ ; (b)  $\text{Zn}_{3.22}\text{Mn}_{0.78}\text{Ga}_{14}\text{Sn}_2\text{S}_{35}$ ; (c)  $\text{Zn}_{3.06}\text{Mn}_{0.94}\text{Ga}_{14}\text{Sn}_2\text{S}_{35}$ .

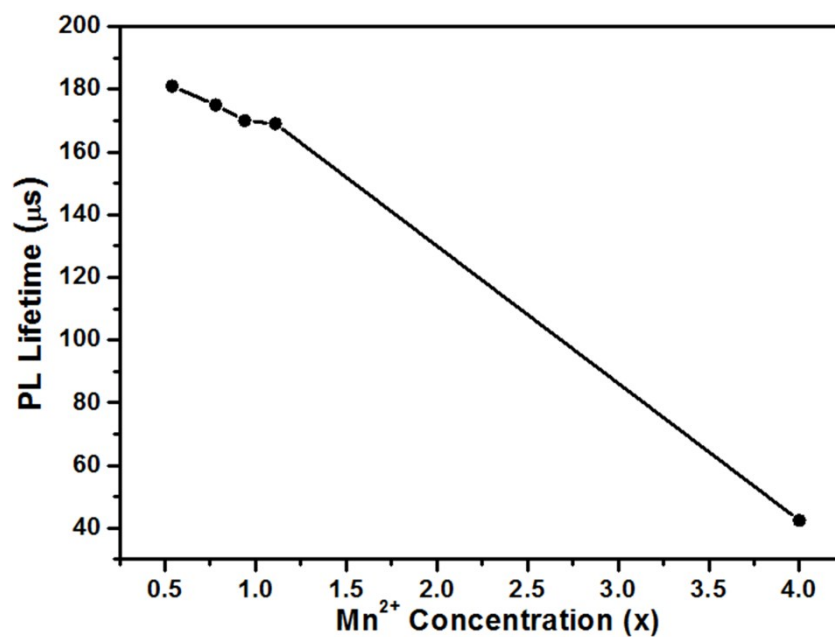

**Fig. S7** Mn<sup>2+</sup> concentration-dependent decay time of Mn<sup>2+</sup>-doped samples monitored at 642 nm upon the excitation of 474 nm at room temperature.

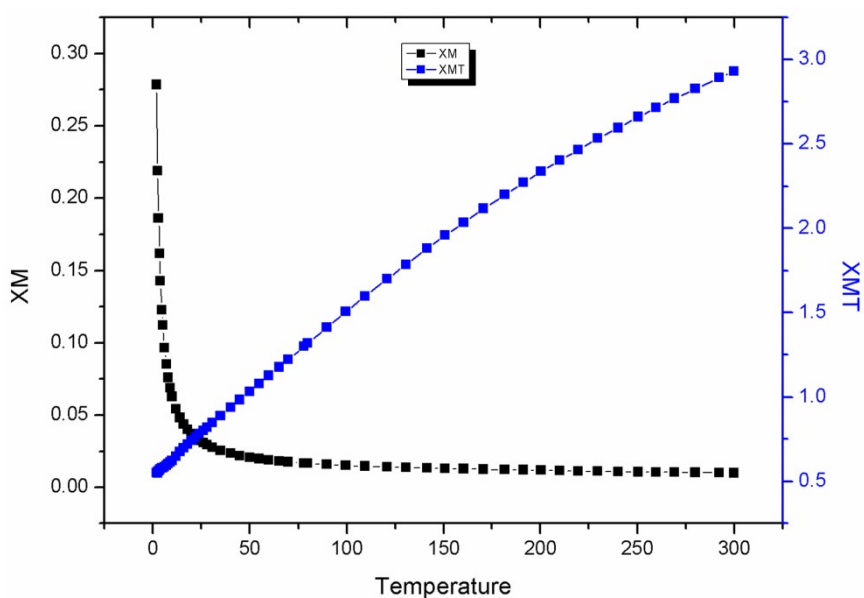

**Fig. S8** The variable-temperature (2-300 K) magnetic susceptibility of the heavily-doped NC Mn<sub>4</sub>Ga<sub>4</sub>Sn<sub>2</sub>S<sub>35</sub>.

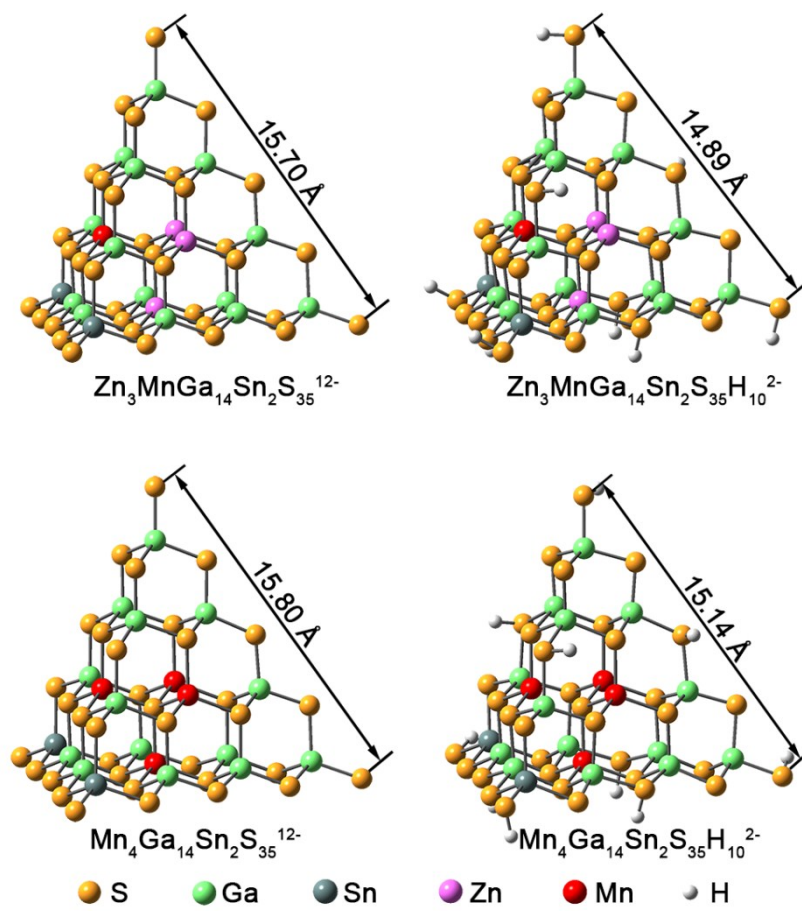

**Fig. S9** Optimized structure of the bare and protonated NCs.

**Table S1** The molar ratio of Zn : Mn in the Mn<sup>2+</sup>-doped samples.

| <b>Zn(NO<sub>3</sub>)<sub>2</sub>·6H<sub>2</sub>O<br/>(mg)</b> | <b>Mn(Ac)<sub>2</sub>·4H<sub>2</sub>O<br/>(mg)</b> | <b>Raw molar ratio<br/>of Zn : Mn</b> | <b>Actual Molar ratio of Zn : Mn</b> |                |
|----------------------------------------------------------------|----------------------------------------------------|---------------------------------------|--------------------------------------|----------------|
|                                                                |                                                    |                                       | <b>EDS</b>                           | <b>ICP-OES</b> |
| 76.9                                                           | 28                                                 | 2.78 : 1.22                           | 2.89 : 1.11                          | 3.01 : 0.99    |
| 76.9                                                           | 21                                                 | 3.00 : 1.00                           | 3.06 : 0.94                          | 2.98 : 1.02    |
| 76.9                                                           | 14                                                 | 3.28 : 0.72                           | 3.22 : 0.78                          | /              |
| 76.9                                                           | 7                                                  | 3.60 : 0.40                           | 3.46 : 0.54                          | /              |



**Table S2** PL Lifetime of OCF-40-MnGaSnS monitored at the emission wavelength of 642 nm under different temperature.

| Temp. | A <sub>1</sub> (%) | $\tau_1$ (s) | A <sub>2</sub> (%) | $\tau_2$ (s) | $\tau_{ave}$ (s) |
|-------|--------------------|--------------|--------------------|--------------|------------------|
| 296K  | 45.01              | 1.064058E-05 | 54.99              | 6.849213E-05 | 4.24528E-05      |
| 273K  | 35.35              | 9.669258E-06 | 64.65              | 7.679196E-05 | 5.26773E-05      |
| 243K  | 28.95              | 1.072045E-05 | 71.05              | 9.039018E-05 | 6.73258E-05      |
| 213K  | 21.01              | 1.235974E-05 | 78.99              | 1.122783E-04 | 7.39960E-05      |
| 183K  | 15.26              | 9.668174E-06 | 84.74              | 1.304276E-04 | 1.11999E-04      |
| 153K  | 12.21              | 1.26764E-05  | 87.79              | 1.622251E-04 | 1.43965E-04      |
| 123K  | 15.89              | 1.417034E-05 | 84.11              | 1.76324E-04  | 1.50558E-04      |
| 93K   | 26.75              | 2.898245E-05 | 73.25              | 1.95354E-04  | 1.50849E-04      |
| 63K   | 26.65              | 6.311241E-05 | 73.35              | 2.240722E-04 | 1.81176E-04      |

**Table S3** PL Lifetime of Mn<sup>2+</sup>-doped samples (Zn<sub>4-x</sub>Mn<sub>x</sub>Ga<sub>14</sub>Sn<sub>2</sub>S<sub>35</sub>) under room temperature.

| $\chi$ | A <sub>1</sub> (%) | $\tau_1$     | A <sub>2</sub> (%) | $\tau_2$     | $\tau_{ave}$ (s) |
|--------|--------------------|--------------|--------------------|--------------|------------------|
| 4      | 45.01              | 1.064058E-05 | 54.99              | 6.849213E-05 | 4.24528E-05      |
| 1.11   | 17.39              | 1.79328E-05  | 82.61              | 2.003149E-04 | 1.68599E-04      |
| 0.94   | 14.87              | 1.644032E-05 | 85.13              | 1.969501E-04 | 1.70108E-04      |
| 0.78   | 17.12              | 9.2786E-06   | 82.88              | 2.089991E-04 | 1.74807E-04      |
| 0.54   | 25.34              | 1.188928E-05 | 74.66              | 2.378971E-04 | 1.80627E-04      |

*Full form of reference 27.*

M. J. Frisch, G. W. Trucks, H. B. Schlegel, G. E. Scuseria, M. A. Robb, J. R. Cheeseman, G. Scalmani, V. Barone, B. Mennucci, G. A. Petersson, H. Nakatsuji, M. Caricato, X. Li, H. P. Hratchian, A. F. Izmaylov, J. Bloino, G. Zheng, J. L. Sonnenberg, M. Hada, M. Ehara, K. Toyota, R. Fukuda, J. Hasegawa, M. Ishida, T. Nakajima, Y. Honda, O. Kitao, H. Nakai, T. Vreven, J. J. A. Montgomery, J. E. Peralta, F. Ogliaro, M. Bearpark, J. J. Heyd, E. Brothers, K. N. Kudin, V. N. Staroverov, R. Kobayashi, J. Normand, K. Raghavachari, A. Rendell, J. C. Burant, S. S. Iyengar, J. Tomasi, M. Cossi, N. Rega, J. M. Millam, M. Klene, J. E. Knox, J. B. Cross, V. Bakken, C. Adamo, J. Jaramillo, R. Gomperts, R. E. Stratmann, O. Yazyev, A. J. Austin, R. Cammi, C. Pomelli, J. W. Ochterski, R. L. Martin, K. Morokuma, V. G. Zakrzewski, G. A. Voth, P. Salvador, J. J. Dannenberg, S. Dapprich, A. D. Daniels, O. Farkas, J. B. Foresman, J. V. Ortiz, J. Cioslowski and D. J. Fox, in Gaussian 09 Rev. D.01, Wallingford CT, Gaussian Inc. 2013.
